# Supplementary material for: Comprehensive analysis of aberrant alternative splicing related to carcinogenesis and prognosis of papillary thyroid cancer
Source: publisher site journal article supplement (doi:10.18632/aging.203608), 2021-10-08
Supplement: Supplementary file [file aging-v13i19-203608-supplementary-material-SD1.pdf]

**SUPPLEMENTARY FIGURES**

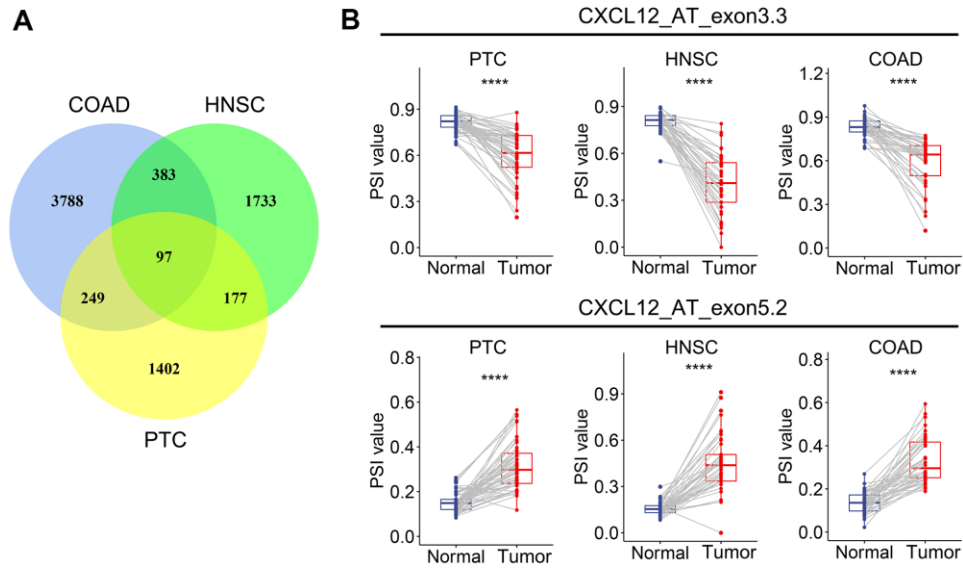

**Supplementary Figure 1. Shared CASEs in PTC, HNSC and COAD.** (A) Venn gram of CASEs in PTC, HNSC and COAD. (B) Representative common CASEs in PTC, HNSC and COAD. AS events with  $|\log_2^{FC}|$  of  $\geq 0.1$ , adjusted P of  $< 0.05$  (adjusted by Benjamini and Hochberg (BH)) were selected as CASEs. \*\*\*\*,  $P < 0.0001$ . CASEs, cancer-associated AS events; AS, alternative splicing; PTC, papillary thyroid cancer; HNSC, head and neck squamous cell carcinoma; COAD, colon adenocarcinoma.

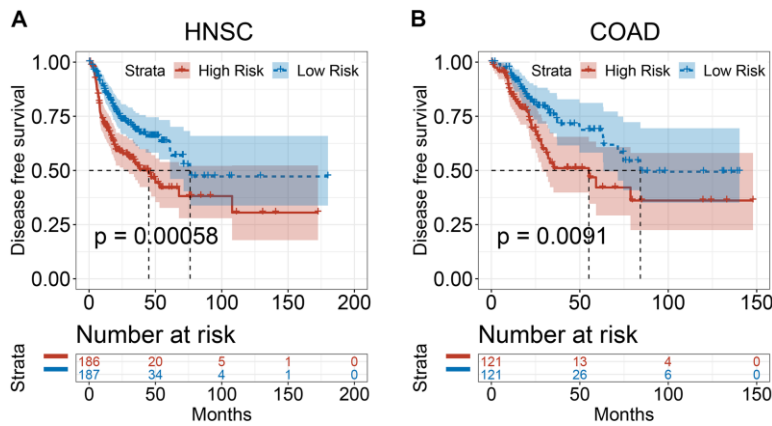

**Supplementary Figure 2. Validation the established prognostic model in HNSC and COAD.** (A) Kaplan-Meier curves of prognostic model for DFS of HNSC patients. (B) Kaplan-Meier curves of prognostic model for DFS of COAD patients. DFS, disease free survival; HNSC, head and neck squamous cell carcinoma; COAD, colon adenocarcinoma.

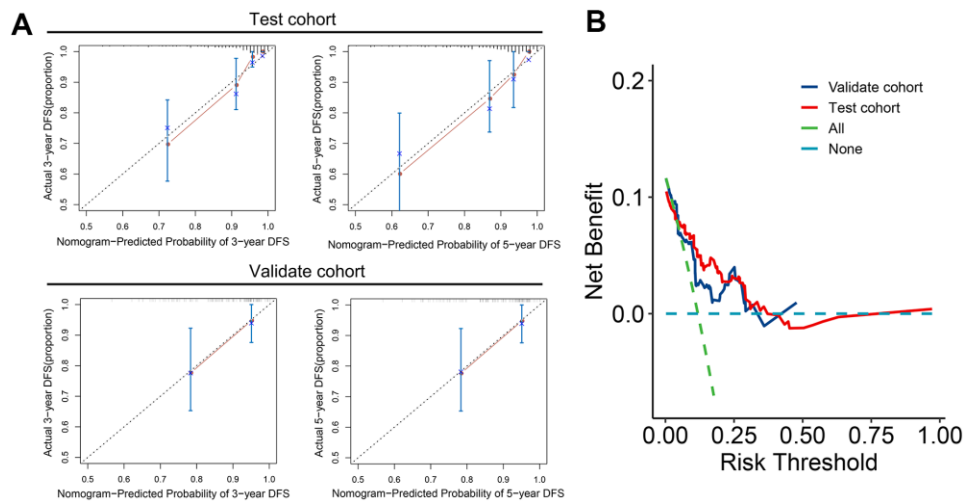

**Supplementary Figure 3. Validation the accuracy and clinical application of established nomogram.** (A) Calibration curves confirm the accuracy of our nomogram for predicting 3- and 5-year DFS in both test and validate cohort. (B) Decision curve analysis curves validate the value of clinical application of our nomogram in both test and validate cohort.
